# Supplementary material
Source: PubMed Central journal article supplement (PMC3811537)
Supplement: AEM.02169-13_zam999104847so1.pdf [file AEM.02169-13_zam999104847so1.pdf]

## SUPPLEMENTARY MATERIALS

**Table S1:** *In situ* conditions and chemical characteristics of investigated peat bogs.

| Peat bog                                                                                                                                                                                                                    | pH      | Conductivity | Total N (mg/l) | Total P (mg/l) | NO <sub>3</sub> <sup>-</sup> (mg/l) | PO <sub>4</sub> <sup>3-</sup> (mg/l) | NH <sub>4</sub> <sup>+</sup> (mg/l) |
|-----------------------------------------------------------------------------------------------------------------------------------------------------------------------------------------------------------------------------|---------|--------------|----------------|----------------|-------------------------------------|--------------------------------------|-------------------------------------|
| <i>Sphagnum</i> -dominated, ombrotrophic peat bog 1<br>Darwin Reserve,<br>58°10'N, 37°33'E<br><b>(S. acidiphila BG32)</b>                                                                                                   | 3,9     | 50           | 1,54           | 0,04           | 0,06                                | 0,02                                 | 0                                   |
| <i>Sphagnum</i> -dominated, ombrotrophic peat bog Obukhovskoye, Yaroslavl region, European<br>North Russia<br>(58°14'N, 38°12'E)<br><b>(T. sphagniphila OB3, S. acidiphila MOB10T)</b>                                      | 3,6-4,0 | 70           | 1,7            | 0,35           | 0,03                                | 0,08                                 | 0                                   |
| <i>Sphagnum</i> -dominated ombrotrophic peat bog 3 - Staroselsky moss, Tver region, European North Russia (56°34'N, 32°46'E)<br>European North Russia (56°34'N, 32°46'E)<br><b>S. rosea S26T, SP5, T. sphagniphila SP2T</b> | 3,8     | 50           | 3,0            | 0,15           | 0,04                                | 0,05                                 | 2,10                                |
